# Supplementary material for: A tailored and red-emissive type I photosensitizer to potentiate photodynamic immunotherapy
Source: Royal Society of Chemistry journal article supplement (doi:10.1039/d2tb01578a), 2022-01-01
Supplement: d2tb01578a1.pdf [file d2tb01578a1.pdf]

## Supporting Information

# **A tailored and red-emissive type I photosensitizer to potentiate photodynamic immunotherapy**

*Sirong Zhou<sup>†</sup>, Ruipeng Li<sup>†</sup>, Ying Li, Yunxia Wang\*, Liheng Feng\**

School of Chemistry and Chemical Engineering, Shanxi University, Taiyuan, 030006,

P.R. China

E-mail: wangyunxia@sxu.edu.cn, lhfeng@sxu.edu.cn.

<sup>†</sup>Sirong Zhou and Ruipeng Li contributed equally to this work.

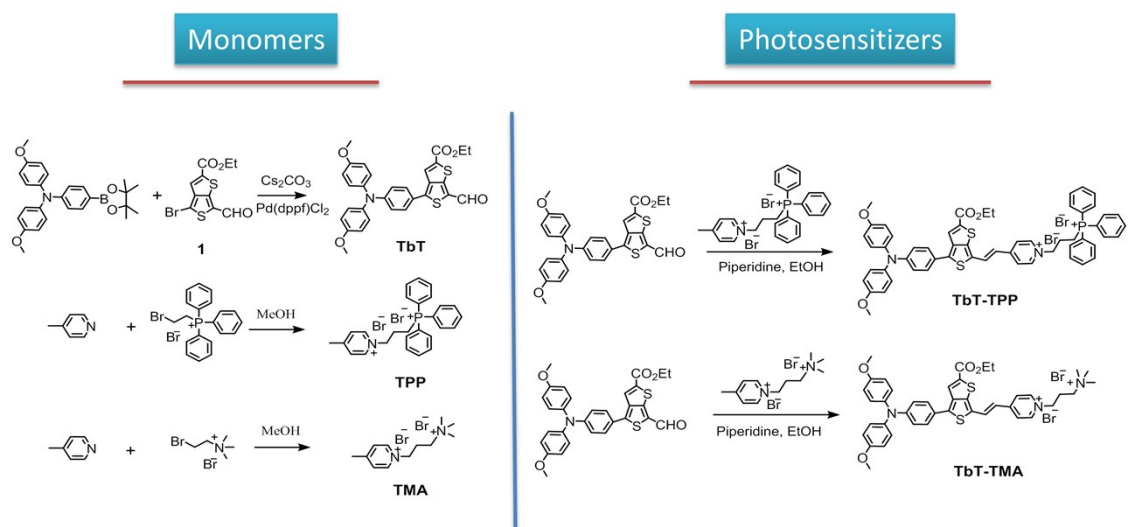

**Scheme S1.** The synthesis routes for photosensitizers TbT-TPP and TbT-TMA.

**a)**

| $V_{\text{(Toluene)}}/V_{\text{(DMSO)}}$ | 0 %           | 50 %          | 70 %          | 90 %          | 95 %           | 97 %           | 98 %           | 99 %           |
|------------------------------------------|---------------|---------------|---------------|---------------|----------------|----------------|----------------|----------------|
| Size (nm)                                | $5.6 \pm 0.9$ | $6.8 \pm 1.4$ | $8.7 \pm 1.5$ | $9.6 \pm 0.7$ | $11.6 \pm 2.1$ | $14.8 \pm 0.8$ | $19.3 \pm 0.9$ | $23.4 \pm 1.3$ |

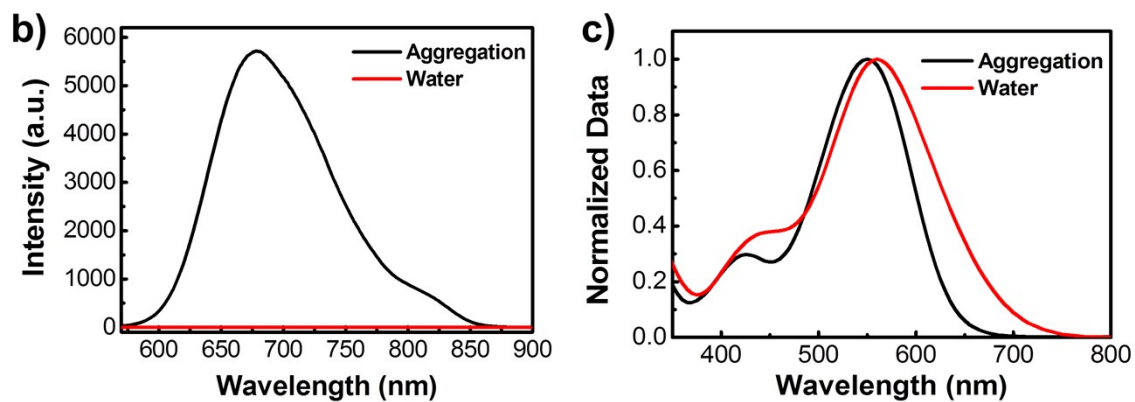

**Fig. S1** a) Hydrodynamic diameters of TbT-TPP (10  $\mu$ M, 2 mL) in Toluene/DMSO mixtures with different toluene fractions. Normalized b) fluorescence intensity and c) absorbance of TbT-TPP (10  $\mu$ M, 2 mL) in aggregation and water.

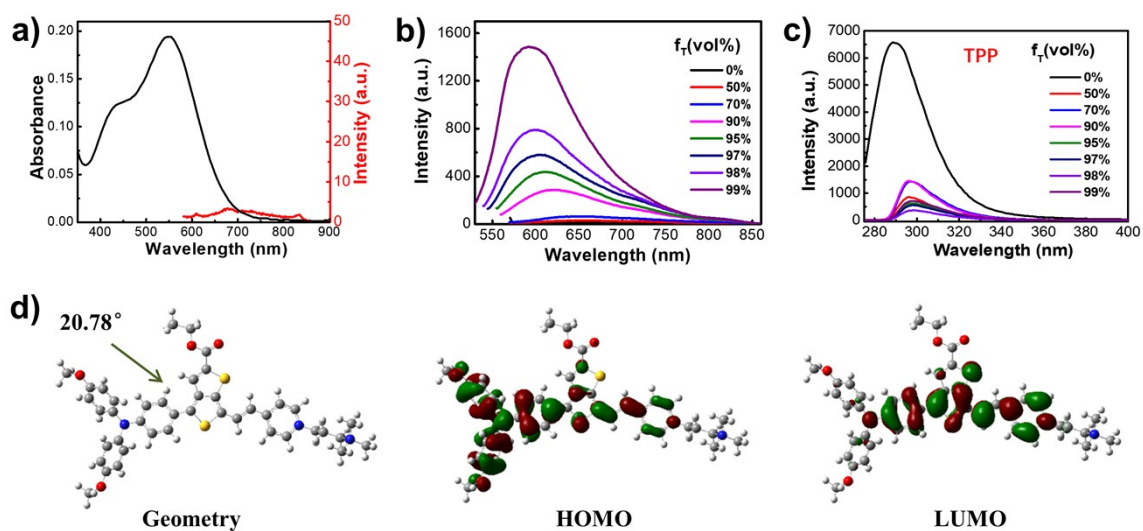

**Fig. S2** a) Absorbance and fluorescence intensity of TbT-TMA (10  $\mu$ M, 2 mL) in water. Fluorescence spectra of b) TbT-TMA(10  $\mu$ M, 1 mL) and c) TPP(10  $\mu$ M, 1 mL) in DMSO/Toluene mixtures with different toluene fractions. d) Optimized geometries and HOMO, LUMO of TbT-TMA.

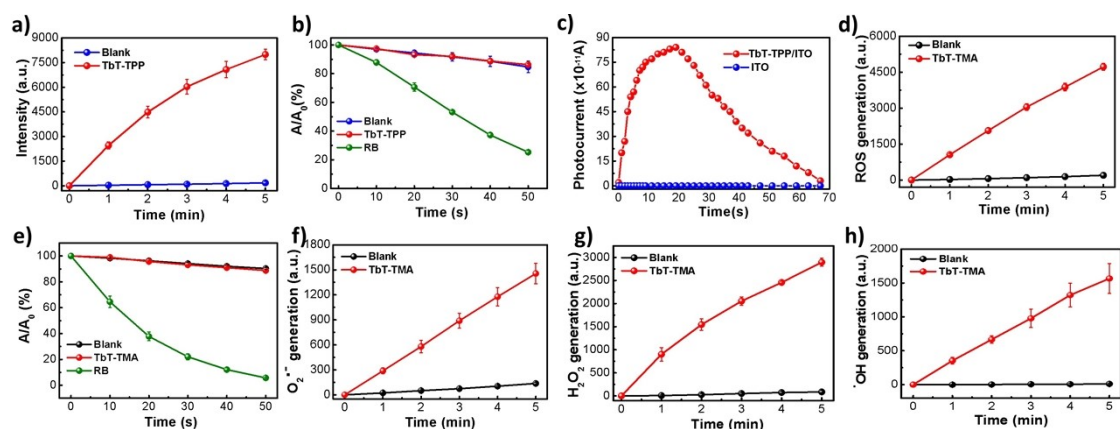

**Fig. S3** a) Fluorescence intensity of DCFH for total ROS detection of TbT-TPP (1  $\mu$ M, 1 mL) under white light irradiation (1 mW/cm<sup>2</sup>, 5 min). b) Decomposition rates of DPBF for <sup>1</sup>O<sub>2</sub> of TbT-TPP (5  $\mu$ M, 2 mL) and RB (5  $\mu$ M, 2 mL) under white light irradiation (5 mW/cm<sup>2</sup>, 50 s), A and A<sub>0</sub> are the absorbance of DPBF at 410 nm. c) Photocurrent response of the TbT-TPP (10 mM) modified ITO or bare ITO electrode to white laser (500-700 nm). A voltage of 0.5 V was used. d) Fluorescence intensity of DCFH for total ROS detection of TbT-TMA (1  $\mu$ M, 1 mL) under white light irradiation (1 mW/cm<sup>2</sup>, 5 min). e) Decomposition rates of DPBF for <sup>1</sup>O<sub>2</sub> of TbT-TMA (5  $\mu$ M, 2 mL) and RB (5  $\mu$ M, 2 mL) under white light irradiation (5 mW/cm<sup>2</sup>, 50 s), A and A<sub>0</sub> are the absorbance of DPBF at 410 nm. f) Fluorescence intensity of DHE for O<sub>2</sub><sup>-</sup>, g) Hydrogen Peroxide Assay Kit for H<sub>2</sub>O<sub>2</sub>, and h) APF for  $\cdot$ OH of TbT-TMA under white light irradiation (5 mW/cm<sup>2</sup>, 5 min).

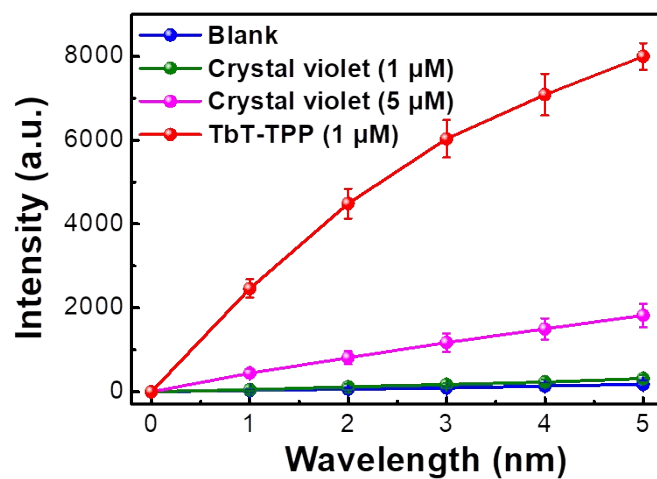

**Fig. S4** Fluorescence intensity of DCFH for total ROS detection of TbT-TPP (1  $\mu$ M) and crystal violet (1  $\mu$ M, 5  $\mu$ M) under white light irradiation (1 mW/cm<sup>2</sup>, 5 min).

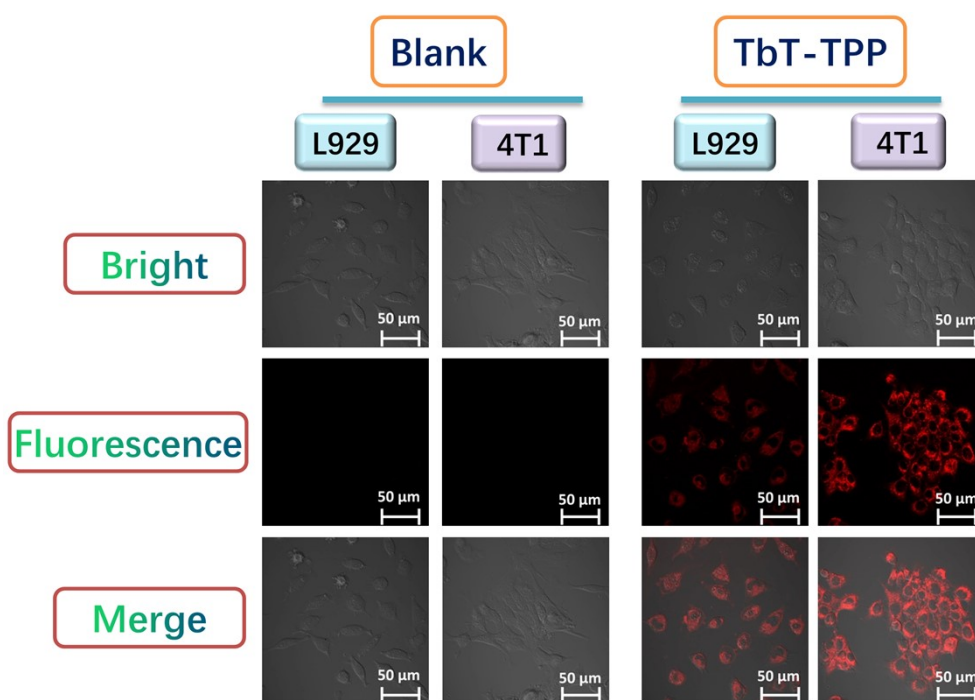

**Fig. S5** CLSM images of 4T1 cells and L929 cells after incubated with TbT-TPP (10  $\mu$ M) under normoxic condition.

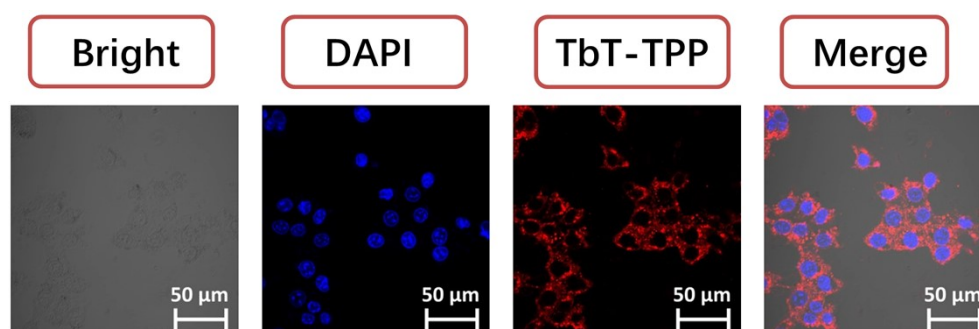

**Fig. S6** CLSM images of 4T1 cells after incubation with TbT-TPP (10 μM) and DAPI.

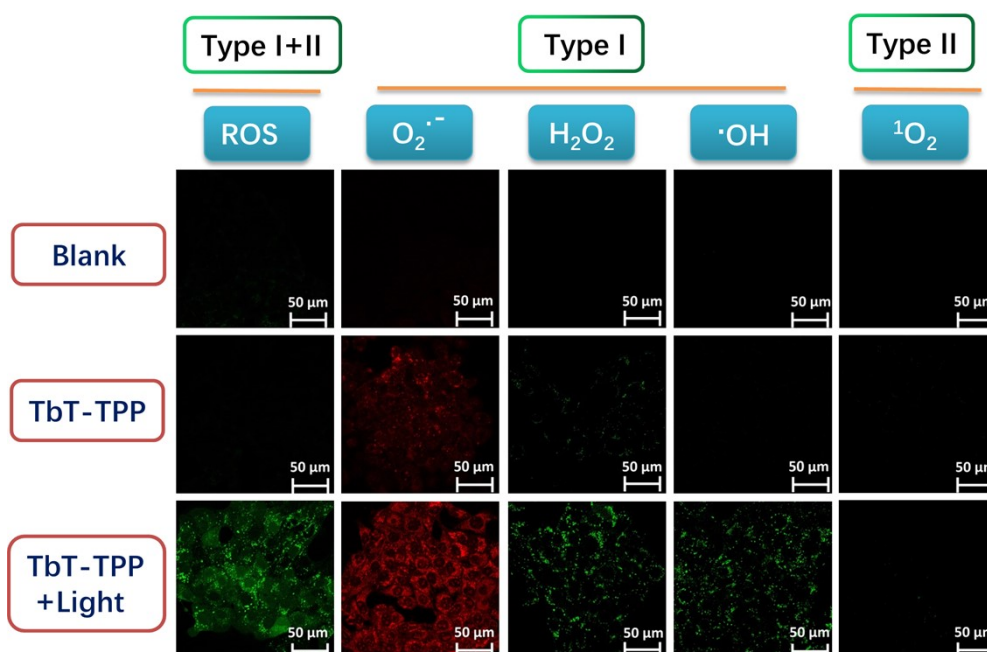

**Fig. S7** CLSM images of intracellular ROS generation in 4T1 cells stained with DCFH-DA, DHE, Hydrogen Peroxide Assay Kit, APF and SOSG as indicators (10 μM) after incubation with TbT-TPP (10 μM) without or with white light irradiation (20 mW/cm<sup>2</sup>, 20 min) under hypoxic conditions.

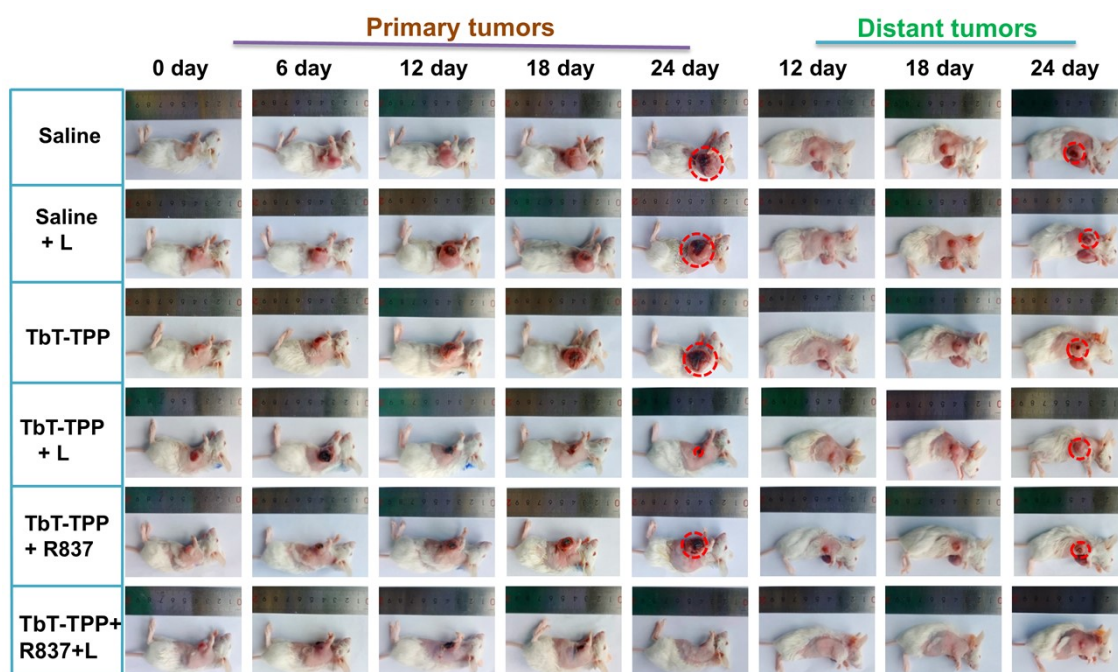

**Fig. S8** The representative photographs of 4T1 tumor-bearing mice during different treatments.

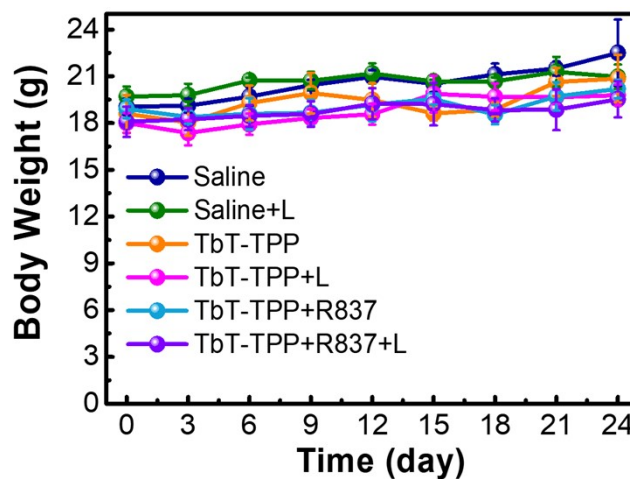

**Fig. S9.** The body weight changes of the mice treated with different treatments.
